# Supplementary material for: Screening of pH-responsive long-circulating polysaccharide–drug conjugate nanocarriers for antitumor applications
Source: Royal Society of Chemistry journal article supplement (doi:10.1039/c8tb02474j), 2018-11-29
Supplement: c8tb02474j1.pdf [file c8tb02474j1.pdf]

# Screening of pH-responsive and long circulating polysaccharide-drug conjugate nanocarriers for anti-tumor applications

Xinyu Zhang <sup>a,†</sup>, Dandan Li <sup>a,b,†</sup>, Jun Huang <sup>c</sup>, Kunyong Ou <sup>a</sup>, Binyuan Yan <sup>b</sup>, Fu Shi <sup>b</sup>,  
Jiayuan Zhang <sup>d</sup>, Junfu Zhang <sup>b</sup>, Jun Pang <sup>b,\*</sup>, Yang Kang <sup>a,b,\*</sup>, Jun Wu <sup>a,\*</sup>

*a. Key Laboratory of Sensing Technology and Biomedical Instrument of Guangdong Province, School of Biomedical Engineering, Sun Yat-sen University, Guangzhou, 510006, China..*

*b. Department of Urology, The Seventh Affiliated Hospital, Sun Yat-sen University, Shenzhen, 518107, China.*

*c. Department of Colorectal Surgery, The Sixth Affiliated Hospital, Sun Yat-sen University, Guangzhou, 510655, China*

*d. The True Light Middle School in Guangzhou, Liwan District, Guangzhou, 510380, China*

\*Email -[pangjun530@163.com](mailto:pangjun530@163.com) <sup>†</sup> - Dual contributors

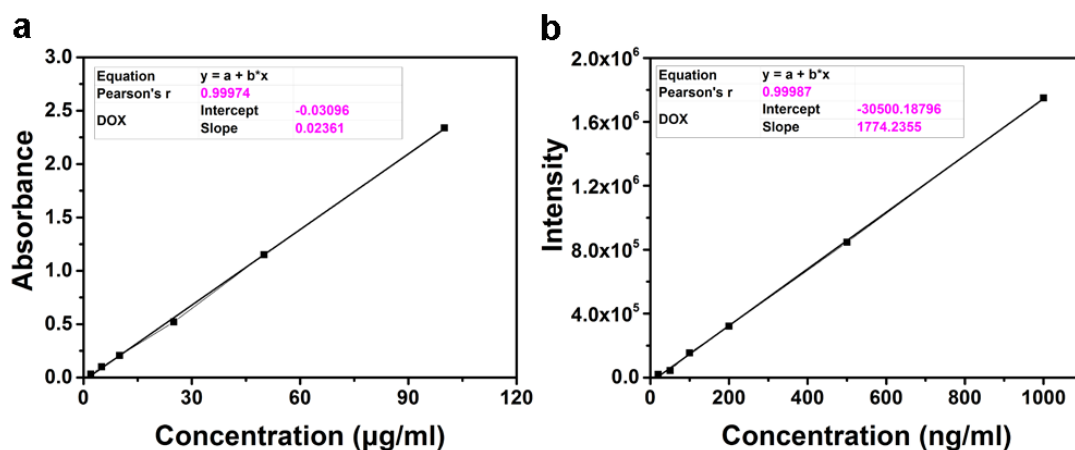

**Figure S1** (a) The calibration curves of Dox (based on UV-Vis). (b) The calibration curves of CPT and Dox (based on Fluorescence emission).

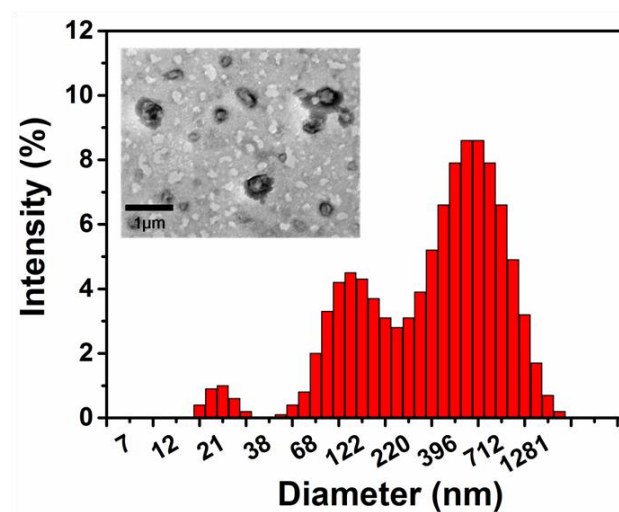

**Figure. S2** TEM microimage and  $D_{f,s}$  of Dex<sub>40k</sub>-Dox

|                     | Oxidation degree<br>(mmol/g) | Drug loading capacity (%) | Stability of nanoparticles |
|---------------------|------------------------------|---------------------------|----------------------------|
| Alg-LV              | 0.21                         | 0.56%                     | NA                         |
| Alg-HV              | 0.23                         | 0.64%                     | NA                         |
| HA-TLM              | 1.22                         | 1.50%                     | NA                         |
| HA-THM              | 1.45                         | 1.72%                     | NA                         |
| Dex <sub>6k</sub>   | 2.75                         | 9.60%                     | ✓                          |
| Dex <sub>40k</sub>  | 2.85                         | 11.20%                    | ×                          |
| Dex <sub>150k</sub> | 3.13                         | 10.40%                    | ✓                          |

**Table. S1** Comparison of oxidation degree, drug loading and particle size stability of different systems  
 Alg-LV (low viscosity sodium alginate); Alg-HV high viscosity sodium alginate; HA-TLM (Low molecular weight sodium hyaluronate); HA-THM (High molecular weight sodium hyaluronate); NA (not available).
